# Supplementary material for: Water-Deficit Stress in the Epiphytic Elkhorn Fern: Insight into Photosynthetic Response
Source: MDPI journal article supplement (doi:10.3390/ijms241512064), 2023-07-27
Supplement: s1 [file s1]

## Supplementary materials

**Figure S1.** Reflectance curves in *Platyserium bifurcatum* leaves: A - average values at the beginning of the experiment and 6 week after dehydration, B - average values in control plants at the beginning and end of the experiment. Mean values of 5 biological replicates for each treatment

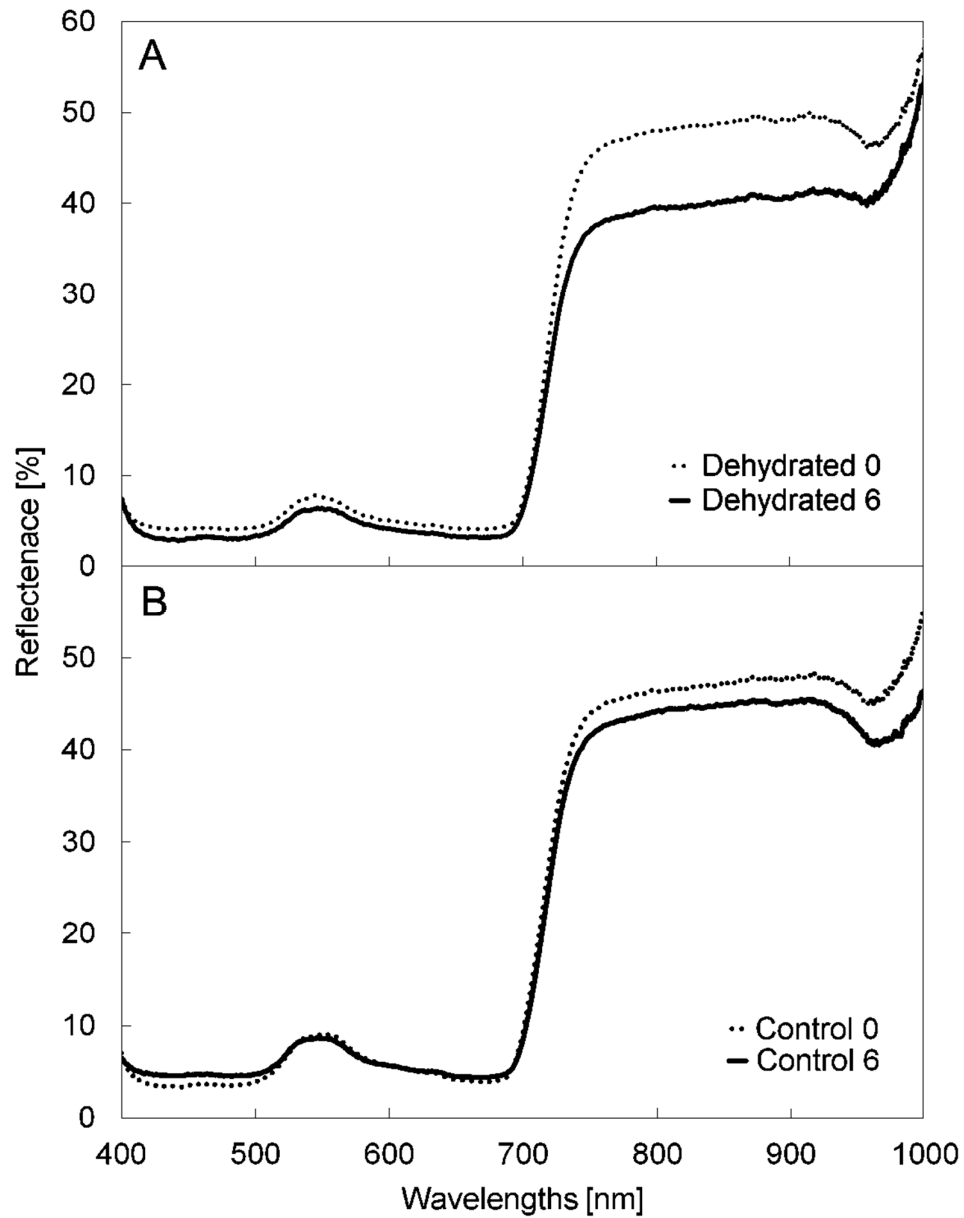

**Figure S2.** Chlorophyll *a* fluorescence induction curves (OJIP) in *Platycerium bifurcatum* leaves: A - in the following 6 weeks after dehydration and B - in control plants (at the beginning and in the following 6 weeks of the experiment. Mean values of 5 biological replicates for each treatment

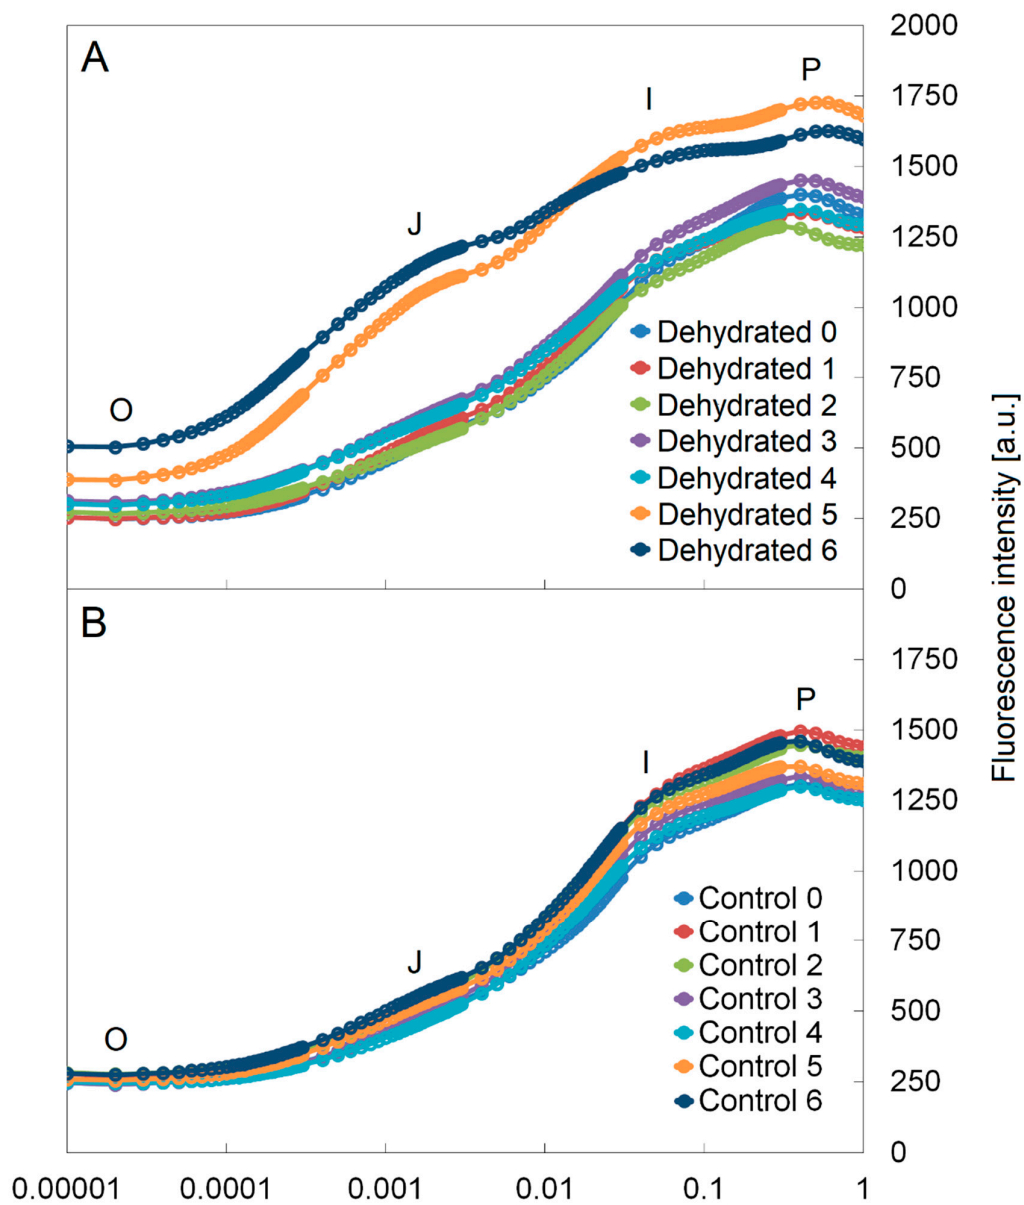

**Figure S3.** Low-temperature fluorescence curves at 77K in *Platycerium bifurcatum* leaves: A - in the following 6 weeks after dehydration and B - in control plants (at the beginning and in the following 6 weeks of the experiment. Mean values of 5 biological replicates for each treatment

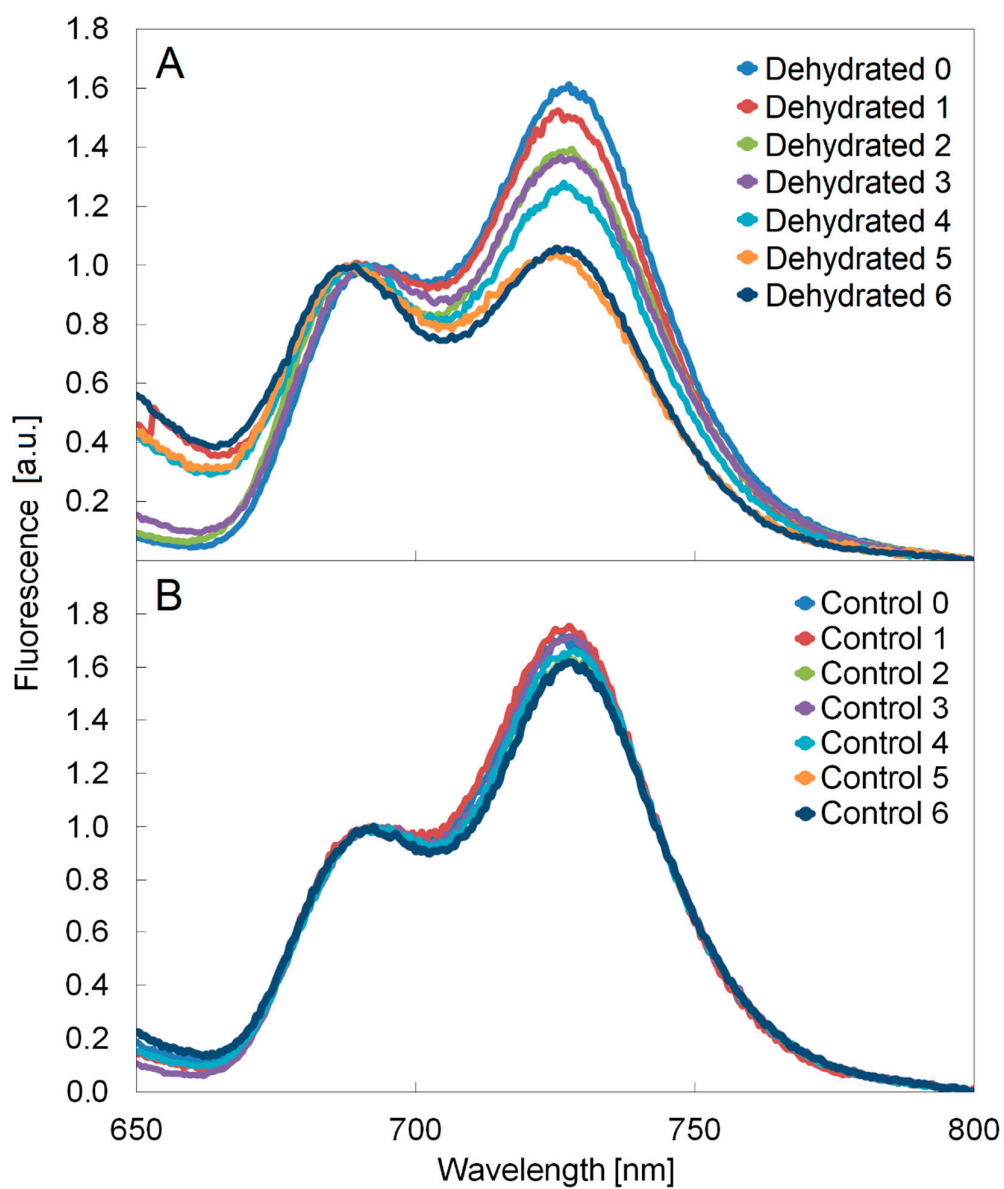

**Table S1.** Reflectance parameters of *Platycerium bifurcatum* leaves under control conditions for 6 weeks (W1-W6) and at the beginning of the experiment (W0). Mean values from 5 biological replicates marked with different letters in the line differ significantly according to the Tukey's test,  $p \leq 0.05$

| Parameters | W0                | W1                | W2                | W3                | W4                | W5                | W6                |
|------------|-------------------|-------------------|-------------------|-------------------|-------------------|-------------------|-------------------|
| ARI1       | 0.006a<br>±0.002  | 0.002a<br>±0.002  | 0.001a<br>±0.003  | 0.003a<br>±0.002  | 0.004a<br>±0.002  | 0.005a<br>±0.003  | 0.006a<br>±0.002  |
| CRI1       | 0.162a<br>±0.025  | 0.156a<br>±0.023  | 0.108a<br>±0.008  | 0.109a<br>±0.009  | 0.115a<br>±0.008  | 0.110a<br>±0.009  | 0.107a<br>±0.008  |
| SIPI       | 0.868a<br>±0.010  | 0.878a<br>±0.009  | 0.857a<br>±0.007  | 0.853a<br>±0.006  | 0.856a<br>±0.007  | 0.850a<br>±0.007  | 0.858a<br>±0.006  |
| FRI        | -1.883a<br>±0.216 | -2.178a<br>±0.458 | -1.766a<br>±0.247 | -1.916a<br>±0.216 | -2.151a<br>±0.195 | -1.875a<br>±0.205 | -2.094a<br>±0.206 |
| PRI        | 0.088a<br>±0.004  | 0.063bc<br>±0.006 | 0.080ab<br>±0.004 | 0.069ab<br>±0.006 | 0.069ab<br>±0.004 | 0.068ab<br>±0.007 | 0.042c<br>±0.005  |

**Table S2.** Values of chlorophyll *a* fluorescence parameters of *Platycerium bifurcatum* leaves under control conditions for 6 weeks (W1-W6) and at the beginning of the experiment (W0). Mean values from 5 biological replicates marked with different letters in the line differ significantly according to the Tukey's test,  $p \leq 0.05$

| Parameters                                             | W0                | W1                | W2                | W3                | W4                | W5                | W6               |
|--------------------------------------------------------|-------------------|-------------------|-------------------|-------------------|-------------------|-------------------|------------------|
| Measured parameters and basic JIP-test parameters      |                   |                   |                   |                   |                   |                   |                  |
| PI <sub>total</sub>                                    | 8.450a<br>±1.284  | 7.364ab<br>±0.729 | 5.877b<br>±0.966  | 6.859ab<br>±0.962 | 6.546ab<br>±0.852 | 4.988b<br>±0.308  | 5.083b<br>±0.362 |
| Fv/F <sub>0</sub>                                      | 4.556a<br>±0.123  | 4.639a<br>±0.195  | 4.381a<br>±0.216  | 4.613a<br>±0.262  | 4.384a<br>±0.341  | 4.608a<br>±0.110  | 4.523a<br>±0.125 |
| Fv/Fm                                                  | 0.819a<br>±0.004  | 0.826a<br>±0.004  | 0.811a<br>±0.008  | 0.824a<br>±0.006  | 0.806a<br>±0.014  | 0.821a<br>±0.004  | 0.818a<br>±0.004 |
| A <sub>M</sub>                                         | 47228a<br>±3908   | 43852ab<br>±3758  | 41567ab<br>±4355  | 36197b<br>±2587   | 34272b<br>±2899   | 38784ab<br>±2937  | 39412ab<br>±3289 |
| Specific Energy fluxes expressed per active RC of PSII |                   |                   |                   |                   |                   |                   |                  |
| ABS/RC                                                 | 1.295a<br>±0.039  | 1.235a<br>±0.043  | 1.360a<br>±0.066  | 1.237a<br>±0.063  | 1.250a<br>±0.068  | 1.400a<br>±0.049  | 1.412a<br>±0.056 |
| DI <sub>0</sub> /RC                                    | 0.235a<br>±0.011  | 0.224a<br>±0.015  | 0.262a<br>±0.023  | 0.233a<br>±0.024  | 0.250a<br>±0.032  | 0.252a<br>±0.013  | 0.259a<br>±0.015 |
| TR <sub>0</sub> /RC                                    | 1.060ab<br>±0.029 | 1.011b<br>±0.030  | 1.099ab<br>±0.044 | 1.004b<br>±0.040  | 1.000b<br>±0.039  | 1.147a<br>±0.037  | 1.153a<br>±0.041 |
| ET <sub>0</sub> /RC                                    | 0.801ab<br>±0.016 | 0.774ab<br>±0.024 | 0.830ab<br>±0.029 | 0.755b<br>±0.031  | 0.767ab<br>±0.032 | 0.842ab<br>±0.031 | 0.854a<br>±0.038 |
| RE <sub>0</sub> /RC                                    | 0.324a<br>±0.015  | 0.282a<br>±0.014  | 0.283a<br>±0.021  | 0.266a<br>±0.024  | 0.269a<br>±0.023  | 0.295a<br>±0.018  | 0.303a<br>±0.021 |
| Quantum yields parameters                              |                   |                   |                   |                   |                   |                   |                  |
| φPo                                                    | 0.819a<br>±0.004  | 0.821a<br>±0.006  | 0.811a<br>±0.008  | 0.817a<br>±0.010  | 0.806a<br>±0.014  | 0.821a<br>±0.004  | 0.818a<br>±0.004 |
| φEo                                                    | 0.621a<br>±0.011  | 0.629a<br>±0.010  | 0.615a<br>±0.014  | 0.615a<br>±0.013  | 0.618a<br>±0.016  | 0.602a<br>±0.009  | 0.604a<br>±0.010 |
| φRo                                                    | 0.252a<br>±0.015  | 0.228ab<br>±0.008 | 0.208b<br>±0.014  | 0.214b<br>±0.014  | 0.213b<br>±0.012  | 0.209b<br>±0.007  | 0.212b<br>±0.009 |
